# Supplementary material for: Co-Conserved MAPK Features Couple D-Domain Docking Groove to Distal Allosteric Sites via the C-Terminal Flanking Tail
Source: PubMed Central journal article supplement (PMC4370755; doi:10.1371/journal.pone.0119636), 2015-03-23
Supplement: pone.0119636.s007.pdf [file pone.0119636.s007.pdf]

Table S1: Hydrogen Bonding Interactions Extracted from the MD Simulations

| Molecule Type           | Residue i | Residue j | Regions                             | Occupancy | Comments                                 |
|-------------------------|-----------|-----------|-------------------------------------|-----------|------------------------------------------|
| P38, peptide, C-tail    | R70       | D328      | $\alpha$ C helix and L16 3/10 helix | 95%       | MAPK-specific salt bridge interactions   |
|                         | K66       | D328      | $\alpha$ C helix and L16 3/10 helix | 66%       | C-capping interaction of L16 3/10 helix  |
|                         | F99       | K338      | $\beta$ 4- $\beta$ 5 and L16 helix  | 12%       | $\beta$ 4- $\beta$ 5 Insert interactions |
|                         | K139      | P318      | $\alpha$ E helix and L16 loop       | 11%       |                                          |
|                         | A144      | Y323      | $\alpha$ E helix and L16 loop       | 73%       | MAPK-specific alanine (see Fig. 2)       |
|                         | S143      | P318      | $\alpha$ E helix and L16 loop       | 9%        |                                          |
|                         | K76       | E344      | $\alpha$ C helix and L16 loop       | 90%       |                                          |
|                         | R173      | Q325      | A-loop and L16 loop                 | 19%       |                                          |
| P38, no peptide, C-tail | R70       | D328      | $\alpha$ C helix and L16 3/10 helix | 91%       | MAPK-specific salt bridge interactions   |
|                         | K66       | D328      | $\alpha$ C helix and L16 3/10 helix | 76%       | C-capping interaction of L16 3/10 helix  |
|                         | F99       | K338      | $\beta$ 4- $\beta$ 5 and L16 helix  | 12%       | $\beta$ 4- $\beta$ 5 Insert interactions |

|                       |      |      |                                     |     |                                          |
|-----------------------|------|------|-------------------------------------|-----|------------------------------------------|
|                       | K139 | P318 | $\alpha$ E helix and L16 loop       | 10% |                                          |
|                       | A144 | Y323 | $\alpha$ E helix and L16 loop       | 6%  | MAPK-specific alanine (see Fig. 2)       |
|                       | S143 | P318 | $\alpha$ E helix and L16 loop       | ~0% |                                          |
|                       | K76  | E344 | $\alpha$ C helix and L16 loop       | 92% |                                          |
|                       | R173 | Q325 | A-loop and L16 loop                 | ~0% |                                          |
| ERK2, peptide, C-tail | R68  | D334 | $\alpha$ C helix and L16 3/10 helix | 65% | MAPK-specific salt bridge interactions   |
|                       | M96  | K342 | $\beta$ 4- $\beta$ 5 and L16 helix  | 22% | $\beta$ 4- $\beta$ 5 Insert interactions |
|                       | I93  | K342 | $\beta$ 4- $\beta$ 5 and L16 helix  | 10% | $\beta$ 4- $\beta$ 5 Insert interactions |
|                       | K71  | E348 | $\alpha$ C helix and L16 loop       | 77% |                                          |
|                       | A141 | F327 | $\alpha$ E helix and L16 loop       | 85% | MAPK-specific alanine (see Fig. 2)       |
|                       | S140 | A323 | $\alpha$ E helix and L16 loop       | 79% |                                          |
|                       | D175 | K328 | A-loop and L16 loop                 | 40% |                                          |
|                       | H178 | D335 | A-loop and L16 loop                 | 21% |                                          |

|                          |      |      |                                     |     |                                          |
|--------------------------|------|------|-------------------------------------|-----|------------------------------------------|
| ERK2, no peptide, C-tail | R68  | D330 | $\alpha$ C helix and L16 3/10 helix | 99% | MAPK-specific salt bridge interactions   |
|                          | M96  | K342 | $\beta$ 4- $\beta$ 5 and L16 helix  | 18% | $\beta$ 4- $\beta$ 5 Insert interactions |
|                          | I93  | K342 | $\beta$ 4- $\beta$ 5 and L16 helix  | 11% | $\beta$ 4- $\beta$ 5 Insert interactions |
|                          | K71  | E348 | $\alpha$ C helix and L16 loop       | 67% |                                          |
|                          | A141 | F327 | $\alpha$ E helix and L16 loop       | 93% | MAPK-specific alanine (see Fig. 2)       |
|                          | S140 | A323 | $\alpha$ E helix and L16 loop       | 7%  |                                          |
|                          | D175 | K328 | A-loop and L16 loop                 | ~0% |                                          |
|                          | H178 | D335 | A-loop and L16 loop                 | ~0% |                                          |
